# Supplementary material for: Single versus continuous sustained inflations during chest compressions and physiological-based cord clamping in asystolic lambs
Source: HighWire-hosted journal article supplement (doi:10.1136/archdischild-2021-322881), 2021-11-29
Supplement: archdischild-2021-322881supp001_data_supplement.pdf [file archdischild-2021-322881supp001_data_supplement.pdf]

**Supplementary Figure 1** A) Systolic and B) diastolic carotid arterial blood pressures (CAP), D) peak-systolic and E) end-diastolic pulmonary blood flows (PBF) and F) peak-systolic and G) end-diastolic carotid arterial blood flows (CaBF) measured at control (Fetal, F), at the end of the asphyxia period (A) and upon return of spontaneous circulation (ROSC) in ICC+SI<sub>sing</sub> (blue), PBCC+SI<sub>sing</sub> (red), ICC+SI<sub>cont</sub> (green) and PBCC+SI<sub>cont</sub> (purple) lambs. Data are mean  $\pm$  SEM. \* indicates significant differences  $p < 0.05$  with comparisons shown on graphs.
